# Supplementary material
Source: PubMed Central journal article supplement (PMC4569955)

Supplemental Figure: Fischell et al.

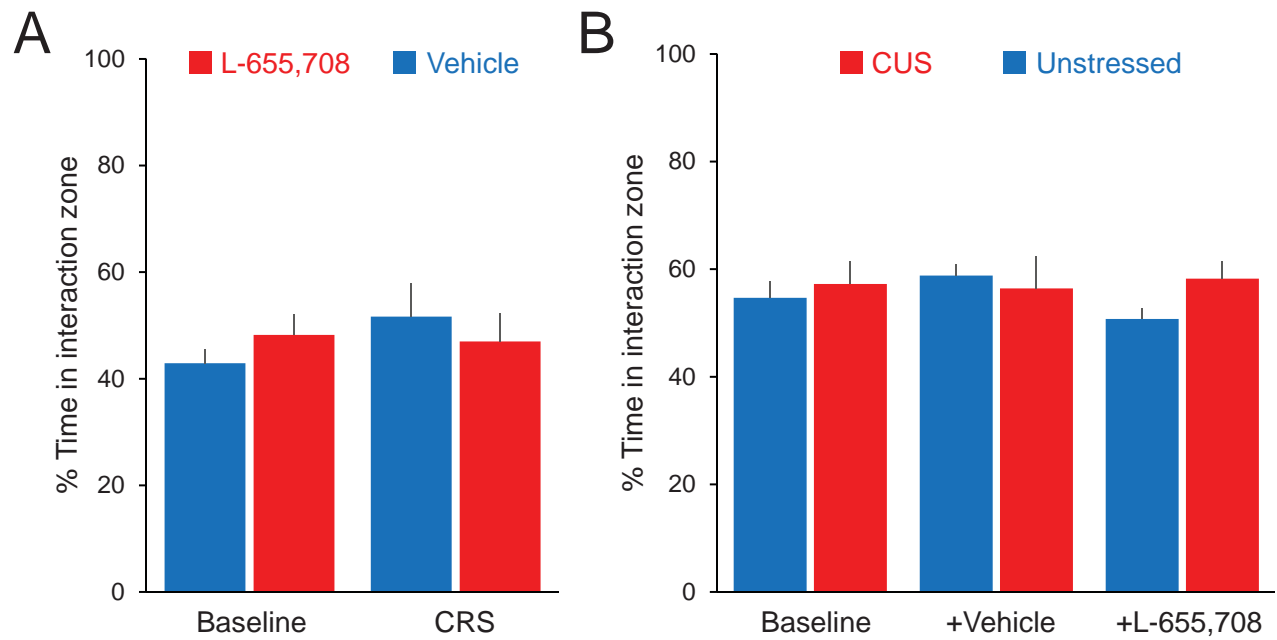

Supplement: npp2015112x1.pdf [file npp2015112x1.pdf]
